# Supplementary material for: Patient characteristics and cardiac surgical outcomes at a tertiary care hospital in Kenya, 2008–2017: a retrospective study
Source: PeerJ. 2021 May 10;9:e11191. doi: 10.7717/peerj.11191 (PMC8117927; doi:10.7717/peerj.11191)
Supplement: Supplemental Information 1 — Contains descriptions of the variables in the dataset. [file peerj-09-11191-s001.xlsx]

## Sheet: Sheet1
Variable Name	Value	Label
Gender	0	Male
	1	Female
AdultAge_binom	0	18-49
	1	>=50
Bodymassindex	1	<5th percentile (underweight)
	2	5th-85th percentile (healthy weight)
	3	85th-95th percentile (overweight)
	4	>95th percentile (obese)
Address	1	Central
	2	Rift valley
	3	Coastal
	4	Nairobi
	5	Western
	6	Eastern
	7	International
	8	South
	9	Other
Address_binom	0	Nairobi/Central
	1	Other
Smoking	0	No
	1	Yes
Alcohol	0	No
	1	Yes
Defect_Class	0	Congenital
	1	Acquired
	2	Both
ASD	0	No
	1	Yes
VSD	0	No
	1	Yes
TOF	0	No
	1	Yes
AVSD	0	No
	1	Yes
Ebsteinanomaly	0	No
	1	Yes
Bicuspidaortic	0	No
	1	Yes
Pulmonaryvalvestenosis	0	No
	1	Yes
TAPV	0	No
	1	Yes
MC	0	No
	1	Yes
SAR	0	No
	1	Yes
MVregurg	0	No
	1	Yes
MVstenosis	0	No
	1	Yes
Aorticregurg	0	No
	1	Yes
Aorticstenosis	0	No
	1	Yes
Tricuspidregurg	0	No
	1	Yes
CADSVD	0	No
	1	Yes
CADDVD	0	No
	1	Yes
CADTVD	0	No
	1	Yes
CADLMD	0	No
	1	Yes
AAA	0	No
	1	Yes
VA	0	No
	1	Yes
NumDef_binom	0	1 or 2 defects
	1	3 or more defects
Poormobility	0	No
	1	Yes
Typeofheartfailure	1	HFPEF
	2	HFREF
PAP	1	<30mmhg
	2	31-55mmhg
	3	>55mmhg
PAP_Complexity	0	<=55mhg
	1	>55mmhg
PulmHTN	0	No
	1	Yes
Optimization	0	No
	1	Yes
EF	1	>50
	2	30-49
	3	<30
ASDC	0	No
	1	Yes
VSDC	0	No
	1	Yes
AVSDR	0	No
	1	Yes
TOFrepair	0	No
	1	Yes
CongenitalTRRepair	0	No
	1	Yes
CTRreplacement	0	No
	1	Yes
Pulmonaryvalvotomy	0	No
	1	Yes
PFOcreation	0	No
	1	Yes
ReroutingpulmveinstoLA	0	No
	1	Yes
Mitralcleftrepair	0	No
	1	Yes
MVR	0	No
	1	Yes
LAReduction	0	No
	1	Yes
Appendectomy	0	No
	1	Yes
LAthrombectomy	0	No
	1	Yes
Maze	0	No
	1	Yes
AcquiredTRepair	0	No
	1	Yes
AVR	0	No
	1	Yes
AVrepair	0	No
	1	Yes
DVR	0	No
	1	Yes
Bentall	0	No
	1	Yes
CABG1G	0	No
	1	Yes
CABG2G	0	No
	1	Yes
CABG3G	0	No
	1	Yes
CABG4G	0	No
	1	Yes
NumProc_binom	0	1 or 2 procedures
	1	3 or more procedures
Durationofprocedure	1	>4 hours
	2	<4 hours
CPB	0	No
	1	Yes
Crossclumpduration	1	90-70 minutes
	2	40-30 minutes
	3	0 minutes
CoolingCPB	1	15-22 C
	2	25-32 C
	3	Normothermia
Cardioplegia	0	No
	1	Yes
DurationonCP	1	<30 minutes
	2	>30 Minutes
	3	0 minutes
Symptomaticheartfailure	0	No
	1	Yes
Atrialfibrillation	0	No
	1	Yes
LAthrombus	0	No
	1	Yes
Infectiveendocarditis	0	No
	1	Yes
Heartblock	0	No
	1	Yes
PAD	0	No
	1	Yes
COPD	0	No
	1	Yes
LRTI	0	No
	1	Yes
HTN	0	No
	1	Yes
DM	0	No
	1	Yes
Nephropathy	0	No
	1	Yes
Dyslipedemia	0	No
	1	Yes
Seizuredo	0	No
	1	Yes
Schizo	0	No
	1	Yes
CVA	0	No
	1	Yes
HIV	0	No
	1	Yes
Thyroidderangement	0	No
	1	Yes
Extracardiaccongenitals	0	No
	1	Yes
PMVBV	0	No
	1	Yes
PMVR	0	No
	1	Yes
PDVRepair	0	No
	1	Yes
SVA	0	No
	1	Yes
HCM	0	No
	1	Yes
Renalstatus	1	On dialysis
	2	Severe
	3	Moderate
	4	Normal
Renalstatus_binom	0	Normal/Moderate
	1	Severe/Dialysis
Renalstatus_vnorm	0	Normal
	1	Non-normal
Pleuraleffusion	0	No
	1	Yes
Pneumothorax	0	No
	1	Yes
Pericardialeffusion	0	No
	1	Yes
Atelectasis	0	No
	1	Yes
Pneumonia	0	No
	1	Yes
Sepsis	0	No
	1	Yes
Haemorrhage	0	No
	1	Yes
AKI	0	No
	1	Yes
Psychosis	0	No
	1	Yes
Stroke	0	No
	1	Yes
Atrialflutter	0	No
	1	Yes
AF	0	No
	1	Yes
Ventriculararrthymia	0	No
	1	Yes
HB	0	No
	1	Yes
HF	0	No
	1	Yes
Reoperationsternal	0	No
	1	Yes
Reoperatedextrasternal	0	No
	1	Yes
Seizure	0	No
	1	Yes
Cardiogenicshock	0	No
	1	Yes
None	0	No
	1	Yes
Death	0	No
	1	Yes
ICUstay	1	<2 days
	2	>2 days
	3	None
Wardstay	1	<4 days
	2	>4 days
	3	None
New_AF	0	No change in AF
	1	New AF
	2	Resolved AF
New_HF	0	No change in HF
	1	New HF
	2	Resolved HF
CABG_12	0	No
	1	Yes
CABG_34	0	No
	1	Yes
Any_CABG	0	No
	1	Yes
Surg_Death	0	No
	1	Yes
